# Supplementary material for: Waterbed inspired stress relaxation strategies of patterned silicon anodes for fast-charging and longevity of lithium microbatteries
Source: Royal Society of Chemistry journal article supplement (doi:10.1039/d3ta03968d), 2023-01-01
Supplement: d3ta03968d1.pdf [file d3ta03968d1.pdf]

## **Supporting information**

### **Waterbeds inspired stress relaxation strategies of patterned silicon anode to realize the fast-charging and longevity lithium microbatteries**

**Yi-Xiu Chen<sup>1</sup>, Yin-Wei Cheng<sup>1</sup>, Jun-Han Huang<sup>1</sup>, Chuan-Pu Liu<sup>1,2\*</sup>**

<sup>1</sup>Department of Materials Science and Engineering, National Cheng Kung University, Tainan, 70001, Taiwan

<sup>2</sup>Hierarchical Green-Energy Materials (Hi-GEM) Research Center,  
National Cheng Kung University, Tainan, 70001, Taiwan

\*Corresponding author's email: [cpliu@mail.ncku.edu.tw](mailto:cpliu@mail.ncku.edu.tw)

**Table S1.** The detailed size of various mesh of the copper microgrids used in this study.

| Average size<br>( $\mu\text{m}$ ) | 30-mesh | 100-mesh | 250-mesh |
|-----------------------------------|---------|----------|----------|
| Square pore                       | 500     | 200      | 50       |
| Wire array                        | 150     | 50       | 10       |

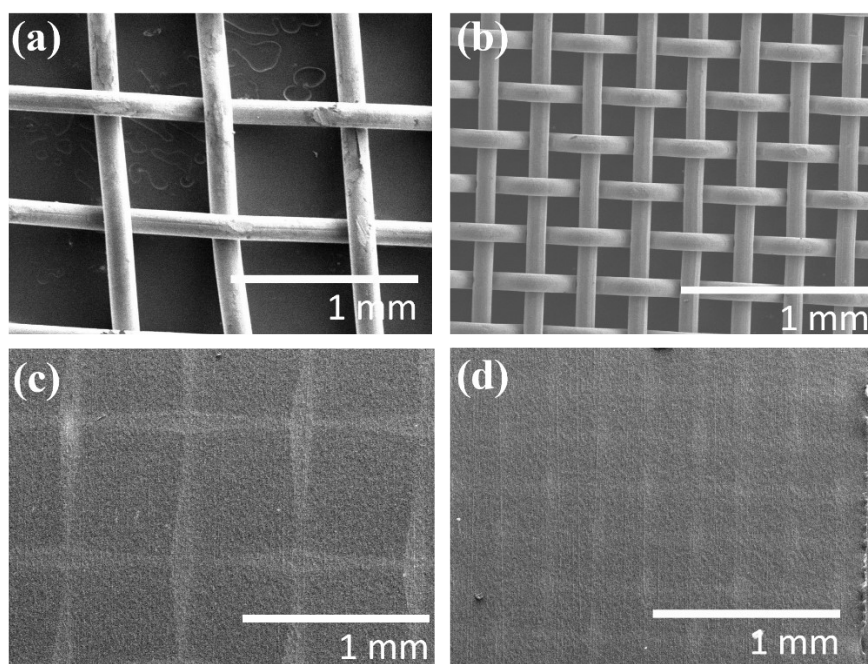

**Figure S1.** SEM images showing topography of the copper microgrid: (a) 30 Mesh, (b) 100 Mesh, and corresponding patterned Si of (c) P-Si30M, (d) P-Si100M.

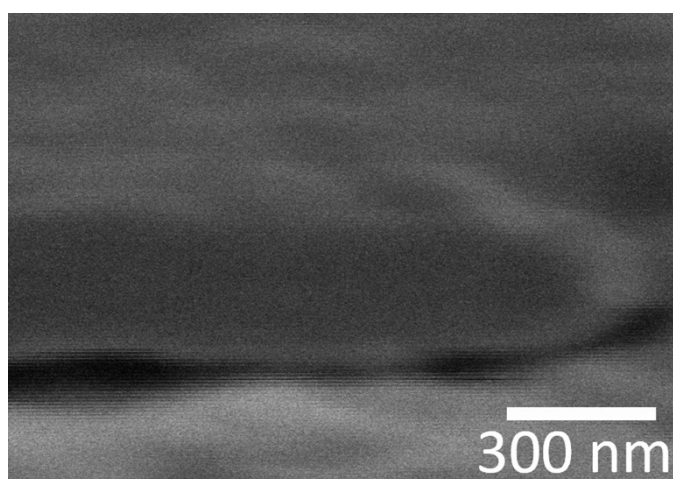

**Figure S2.** The cross-section SEM image of P-Si250 M electrode.

**Table S2.** The lithiation/delithiation capacity, ICE of 1st cycle, and the capacity retention after 200 cycles at 1 C rate correspond to each electrode.

|                 | <b>1<sup>st</sup> lithiation<br/>capacity (mAh/g)</b> | <b>1<sup>st</sup> delithiation<br/>capacity (mAh/g)</b> | <b>ICE<br/>(%)</b> | <b>Retention<br/>(%)</b> |
|-----------------|-------------------------------------------------------|---------------------------------------------------------|--------------------|--------------------------|
| <b>A-Si</b>     | <b>3424.5</b>                                         | <b>2993.7</b>                                           | <b>87.4</b>        | <b>9.1</b>               |
| <b>P-Si30M</b>  | <b>2440.8</b>                                         | <b>2049.3</b>                                           | <b>84.0</b>        | <b>21.6</b>              |
| <b>P-Si100M</b> | <b>2829.2</b>                                         | <b>2164.3</b>                                           | <b>76.5</b>        | <b>36.4</b>              |
| <b>P-Si250M</b> | <b>2665.9</b>                                         | <b>2028.8</b>                                           | <b>76.1</b>        | <b>46.6</b>              |

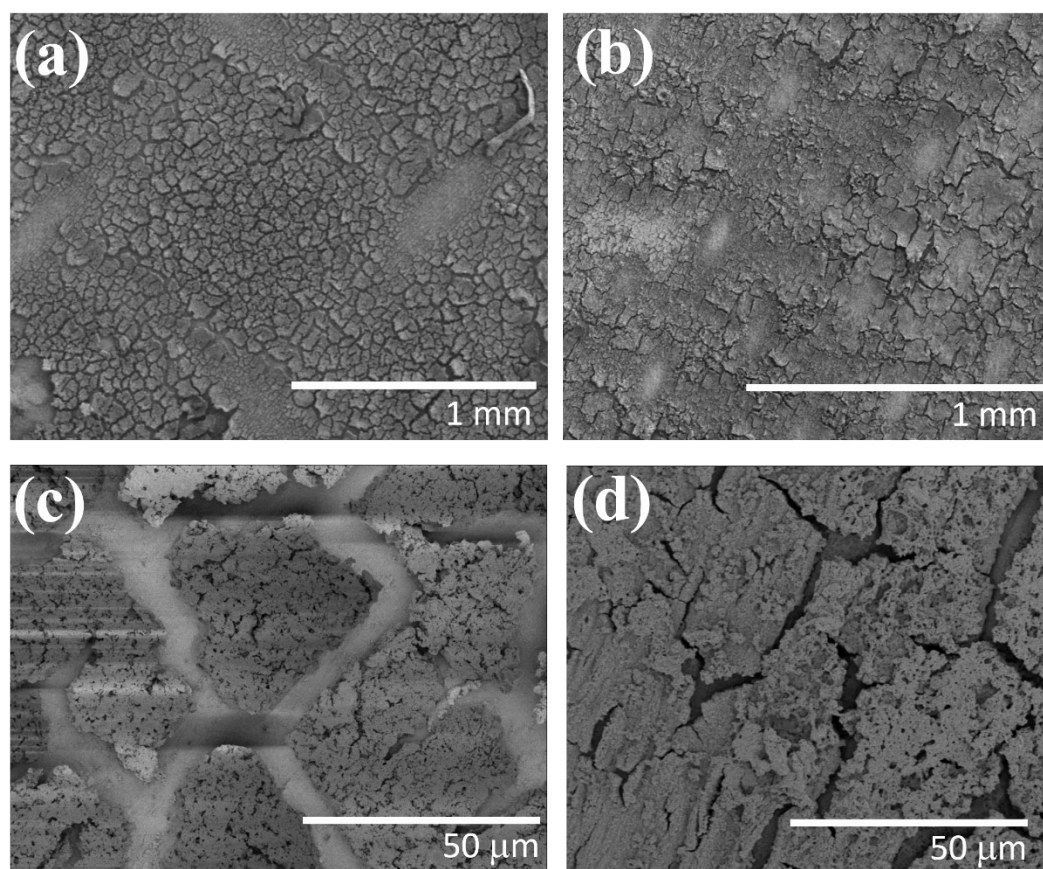

**Figure S3.** SEM images showing topography of the disassembled patterned Si electrodes at low-magnification 50x and high-magnification 1000x for (a, c) P-Si30M, (b, d) P-Si100M.

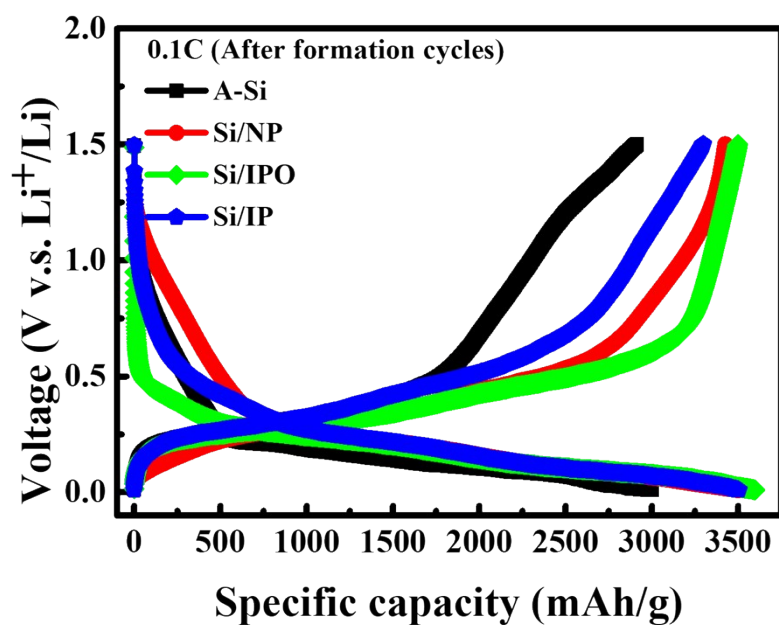

**Figure S4.** The charge/discharge curves at 0.1 C after formation cycles.

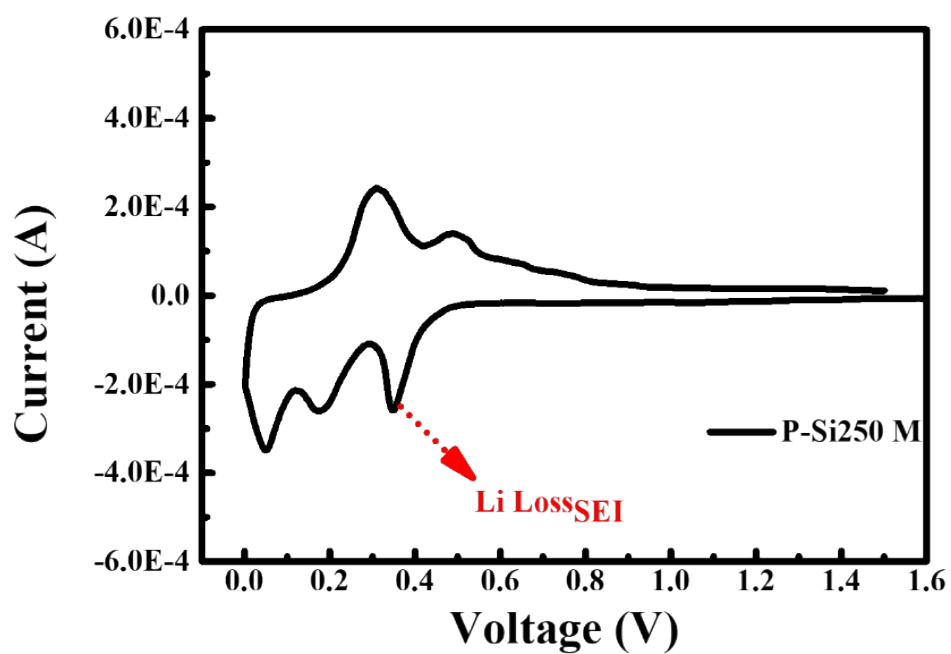

**Figure S5.** 1<sup>st</sup> cycle CV curves at a scan rate of 0.1 mV/s of P-Si250 M patterned Si electrode.

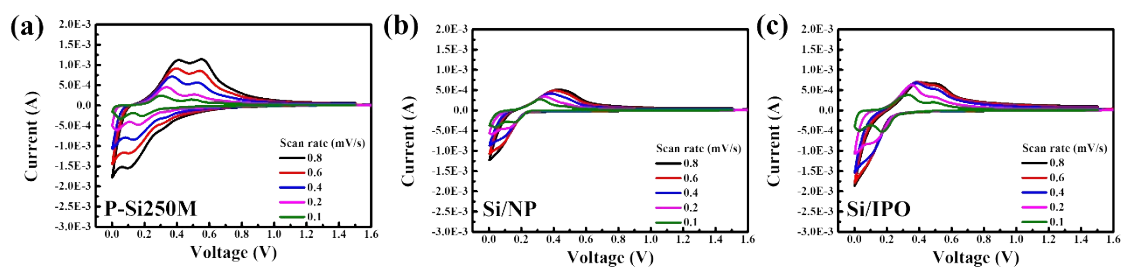

**Figure S6.** CV curves at different voltage scan rates from 0.1 to 0.8 mV/s: (a) P-Si250 M, (b) Si/NP, and (c) Si/IPO electrodes.

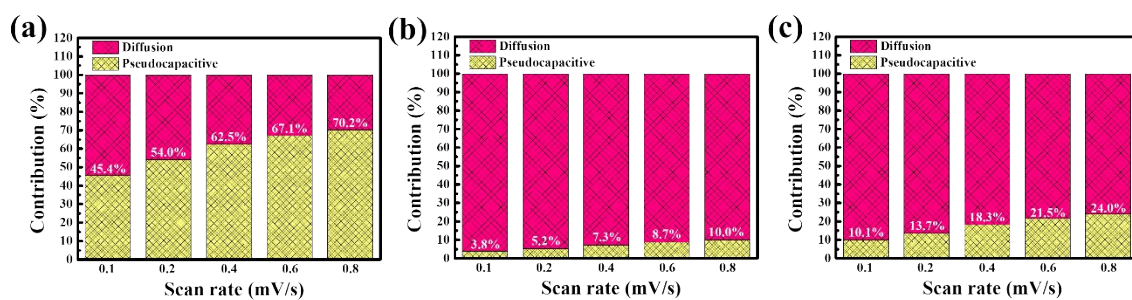

**Figure S7.** Contribution ratio of the pseudocapacitive and diffusion controlled charge versus scan rate: (a) P-Si250 M, (b) Si/NP, and (c) Si/IPO electrodes.
